# Supplementary material for: Toxicity and translocation of Ag, CuO, ZnO and TiO2 nanoparticles upon exposure to fish intestinal epithelial cells
Source: Royal Society of Chemistry journal article supplement (doi:10.1039/d1en00050k), 2021-01-01
Supplement: d1en00050k1.pdf [file d1en00050k1.pdf]

**Toxicity and translocation of Ag, CuO, ZnO and TiO<sub>2</sub> nanoparticles  
upon exposure to fish intestinal epithelial cells.**

MARK GEPPERT, LAURA SIGG & KRISTIN SCHIRMER

--- SUPPLEMENTARY INFORMATION ---

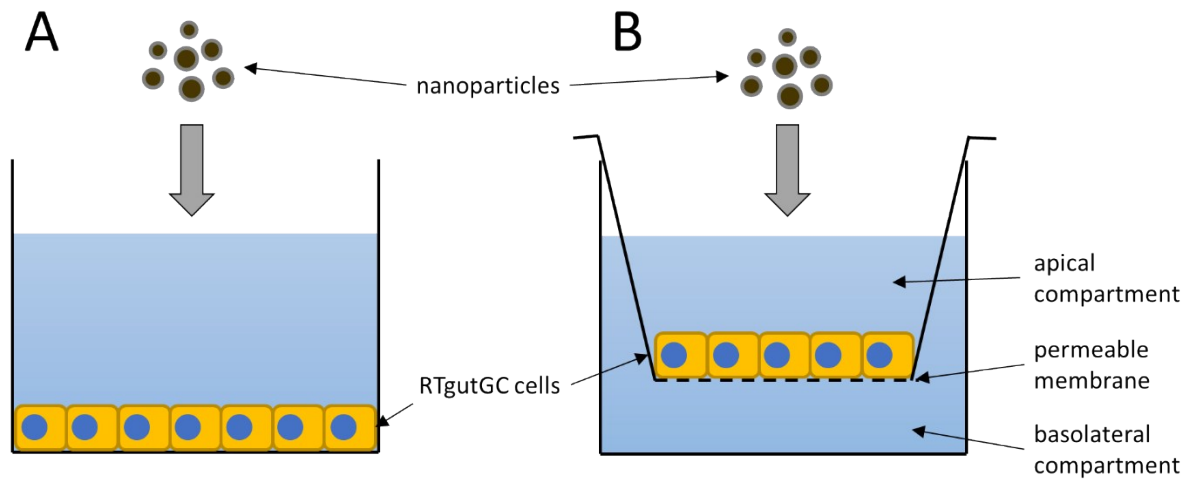

**Figure S1: Scheme of nanoparticle (NP) exposure to RTgutGC cells grown on solid supports (impermeable membranes, A) or permeable membrane supports (B).**
